# Supplementary material
Source: publisher figshare collection journal article supplement (https://wiley.figshare.com/articles/dataset/_/3555615)
Supplement: Supplementary file 1 [file 1 › appendix-A.htm]

Ecological Archives E094-072-A1


*Ecological Archives* E094-072-A1

Brett T. McClintock, Deborah J. F. Russell, Jason Matthiopoulos, Ruth King. 2013. Combining individual animal movement and ancillary biotelemetry data to investigate population-level activity budgets. *Ecology* 94:838–849. http://dx.doi.org/10.1890/12-0954.1

Appendix A. Prior specifications, prior sensitivity, and goodness-of-fit for the harbor seal example.

> View / download PDF.


---

[Back to E094-072]
